# Supplementary material
Source: Preprints.org preprint supplement (doi:10.20944/preprints201905.0246.v1)
Supplement: Supplementary file 1 [file supplementary]

1. Table: 1: Reability and Validity Questionnaires

| **Data Analysis (Cronbach’s Alpha)** | **Reability** | **Validity** |
| --- | --- | --- |
| **Study 1:** Rational Decision Scale | 0,943 | 0,332 - 0,679 |
| **Study 2:** |  |  |
| - 1. Rational Decision Scale | 0,934 | 0,399 – 0,677 |
| - 1. Resilience Scale | 0,928 | 0,399 – 0,767 |
| - 1. Coping Strategy Scale | 0,885 | 0,271 – 0,683 |

2. Table 2: Pearson Correlation of Rational Decisions

| **Variable** | **R** | **Sig** |
| --- | --- | --- |
| Resilience | 0.594 | 0.000 |
| Coping strategy | 0.621 | 0.000 |
| Age | 0.229 | 0.002 |

3. Table: 3: Rational Decisions by the community Affected by Annual Flood

| **Level of Rational Decision** | **N** | **%** |
| --- | --- | --- |
| Very high | 15 | 7,5 % |
| High | 101 | 50,5 % |
| Medium | 53 | 26,5 % |
| Low | 29 | 14,5 % |
| Very Low | 2 | 1 % |

4. Table 4: Resilience, Coping Strategy, Rational Decisions and Age

| Age | | N | Mean |
| --- | --- | --- | --- |
|
| Rational Decision | 19-22 | 49 | 217.3061 |
| 23-25 | 32 | 252.7813 |
| 26-30 | 41 | 260.4390 |
| 31-35 | 14 | 286.3571 |
| 36-40 | 9 | 244.8889 |
| 41-45 | 3 | 235.0000 |
| **46-50** | **4** | **290.5000** |
| 51-60 | 2 | 218.0000 |
| Total | 154 | 246.3052 |
| Resilience | 19-22 | 49 | 103.9592 |
| 23-25 | 32 | 123.9688 |
| 26-30 | 41 | 122.6098 |
| 31-35 | 14 | 130.4286 |
| 36-40 | 9 | 128.5556 |
| 41-45 | 3 | 131.0000 |
| **46-50** | **4** | **143.0000** |
| 51-60 | 2 | 101.5000 |
| Total | 154 | 118.4351 |
| Coping strategy | 19-22 | 49 | 122.4286 |
| 23-25 | 32 | 141.4375 |
| 26-30 | 41 | 148.4634 |
| **31-35** | **14** | **160.2857** |
| 36-40 | 9 | 147.2222 |
| 41-45 | 3 | 147.0000 |
| 46-50 | 4 | 156.5000 |
| 51-60 | 2 | 137.5000 |
| Total | 154 | 139.7597 |
